# Supplementary material
Source: PubMed Central journal article supplement (PMC4789892)
Supplement: azol003209.wt1_default.pdf [file azol003209.wt1_default.pdf]

| <b>Baseline characteristics of TZD exposure groups among controls (n=6699)</b> |                                                           |                                                            |                                             |                                          |
|--------------------------------------------------------------------------------|-----------------------------------------------------------|------------------------------------------------------------|---------------------------------------------|------------------------------------------|
|                                                                                | <b>Exclusive ever use of<br/>pioglitazone<br/>(n=191)</b> | <b>Exclusive ever use of<br/>rosiglitazone<br/>(n=596)</b> | <b>Ever use of both<br/>TZDs<br/>(n=56)</b> | <b>Never use of any TZD<br/>(n=5856)</b> |
| Excessive alcohol use, n (%)                                                   | 14 (7.3)                                                  | 35 (5.9)                                                   | 6 (10.7)                                    | 375 (6.2)                                |
| Body mass index, n (%)                                                         |                                                           |                                                            |                                             |                                          |
| < 30 kg/m <sup>2</sup>                                                         | 104 (54.5)                                                | 322 (54.0)                                                 | 30 (53.6)                                   | 3715 (63.4)                              |
| ≥ 30 kg/m <sup>2</sup>                                                         | 87 (45.6)                                                 | 269 (45.1)                                                 | 26 (46.4)                                   | 2034 (34.7)                              |
| Unknown                                                                        | 0 (0.0)                                                   | 5 (0.8)                                                    | 0 (0.0)                                     | 107 (1.8)                                |
| Smoking status, n (%)                                                          |                                                           |                                                            |                                             |                                          |
| Never                                                                          | 73 (38.2)                                                 | 251 (42.1)                                                 | 30 (53.6)                                   | 2389 (40.8)                              |
| Ever                                                                           | 107 (56.0)                                                | 305 (51.2)                                                 | 23 (41.1)                                   | 2926 (50.0)                              |
| Unknown                                                                        | 11 (5.8)                                                  | 40 (6.7)                                                   | 3 (5.4)                                     | 541 (9.2)                                |
| HbA <sub>1c</sub> , n (%)                                                      |                                                           |                                                            |                                             |                                          |
| ≤ 7.4 %                                                                        | 91 (47.6)                                                 | 310 (52.0)                                                 | 27 (48.2)                                   | 2956 (50.5)                              |
| >7.4 %                                                                         | 85 (44.5)                                                 | 250 (42.0)                                                 | 27 (48.2)                                   | 1680 (28.7)                              |
| Unknown                                                                        | 15 (7.9)                                                  | 36 (6.0)                                                   | 2 (3.6)                                     | 1220 (20.8)                              |
| Previous bladder conditions, n (%)                                             | 12 (6.3)                                                  | 33 (5.5)                                                   | 7 (12.5)                                    | 283 (4.8)                                |
| Previous cancer, n (%) <sup>a</sup>                                            | 14 (7.3)                                                  | 35 (5.9)                                                   | 3 (5.4)                                     | 429 (7.3)                                |
| Charlson comorbidity score, mean (SD)                                          | 0.83 (1.04)                                               | 0.80 (1.04)                                                | 0.98 (1.04)                                 | 0.97 (1.18)                              |
| Anti-diabetic drugs <sup>b</sup> , n (%)                                       |                                                           |                                                            |                                             |                                          |
| Metformin                                                                      | 114 (60.0)                                                | 350 (58.7)                                                 | 38 (67.9)                                   | 3121 (53.3)                              |
| Sulfonylurea                                                                   | 56 (29.3)                                                 | 220 (36.9)                                                 | 17 (30.4)                                   | 2751 (47.0)                              |
| TZD                                                                            | 23 (12.0)                                                 | 29 (4.9)                                                   | 2 (3.6)                                     | 0 (0.0)                                  |
| Other agents                                                                   | 1 (0.5)                                                   | 12 (2.0)                                                   | 0 (0.0)                                     | 54 (0.9)                                 |

Abbreviations: RR, rate ratio; CI, confidence interval; SD, standard deviation; TZD, thiazolidinedione.

<sup>a</sup>Cancers other than non-melanoma skin cancer.

<sup>b</sup>Non-mutually exclusive groups since patients could have received more than one oral hypoglycaemic agent at cohort entry.
