# Supplementary material
Source: PubMed Central journal article supplement (PMC4789892)
Supplement: azol003209.wt2_default.pdf [file azol003209.wt2_default.pdf]

| <b>Rosiglitazone cumulative duration of use and cumulative dosage and the risk of bladder cancer<sup>a</sup></b> |                          |                              |                     |                                         |
|------------------------------------------------------------------------------------------------------------------|--------------------------|------------------------------|---------------------|-----------------------------------------|
|                                                                                                                  | <b>Cases<br/>(n=376)</b> | <b>Controls<br/>(n=6699)</b> | <b>Crude RR</b>     | <b>Adjusted RR (95% CI)<sup>b</sup></b> |
| Never use of any TZD, n (%)                                                                                      | 319 (84.8)               | 5856 (87.4)                  | 1.00 (reference)    | 1.00 (Reference)                        |
| Cumulative duration of rosiglitazone, n (%) <sup>c</sup>                                                         |                          |                              |                     |                                         |
| ≤ 519 days                                                                                                       | 9 (2.4)                  | 197 (2.9)                    | 0.87 (0.44 to 1.74) | 0.80 (0.40 to 1.62)                     |
| > 519 to ≤ 1022 days                                                                                             | 13 (3.5)                 | 203 (3.0)                    | 1.30 (0.72 to 2.34) | 1.33 (0.73 to 2.40)                     |
| > 1022 days                                                                                                      | 14 (3.7)                 | 196 (2.9)                    | 1.31 (0.73 to 2.36) | 1.34 (0.75 to 2.40)                     |
|                                                                                                                  |                          |                              |                     | <i>p-trend</i> = 0.32                   |
| Cumulative dosage of rosiglitazone, n (%) <sup>c</sup>                                                           |                          |                              |                     |                                         |
| ≤ 2464 mg                                                                                                        | 8 (2.1)                  | 206 (3.1)                    | 0.75 (0.36 to 1.55) | 0.71 (0.34 to 1.49)                     |
| > 2464 to ≤ 5152 mg                                                                                              | 15 (4.0)                 | 195 (2.9)                    | 1.47 (0.84 to 2.55) | 1.50 (0.86 to 2.62)                     |
| > 5152 mg                                                                                                        | 13 (3.5)                 | 195 (2.9)                    | 1.28 (0.70 to 2.34) | 1.27 (0.69 to 2.32)                     |
|                                                                                                                  |                          |                              |                     | <i>p-trend</i> = 0.49                   |

Abbreviations: RR, rate ratio; CI, confidence interval; TZD, thiazolidinedione.

<sup>a</sup> Cases and controls were matched on year of birth, year of cohort entry, sex, and duration of follow-up.

<sup>b</sup> Adjusted for excessive alcohol use, obesity, smoking status, HbA<sub>1c</sub>, previous bladder conditions, previous cancer (other than non-melanoma skin cancer), Charlson comorbidity score, and ever use of other anti-diabetic agents (metformin, sulfonylureas, insulin, and other oral hypoglycaemic agents).<sup>c</sup> Categories based on tertiles of the distribution among controls.
